# Supplementary material for: Spontaneous product segregation from reactions in ionic liquids: application in Pd-catalyzed aliphatic alcohol oxidation
Source: Royal Society of Chemistry journal article supplement (doi:10.1039/b920813p), 2009-12-21
Supplement: b920813p.pdf [file b920813p.pdf]

**Supporting information:** NMR spectra as proof of oxidation stability of ionic liquids

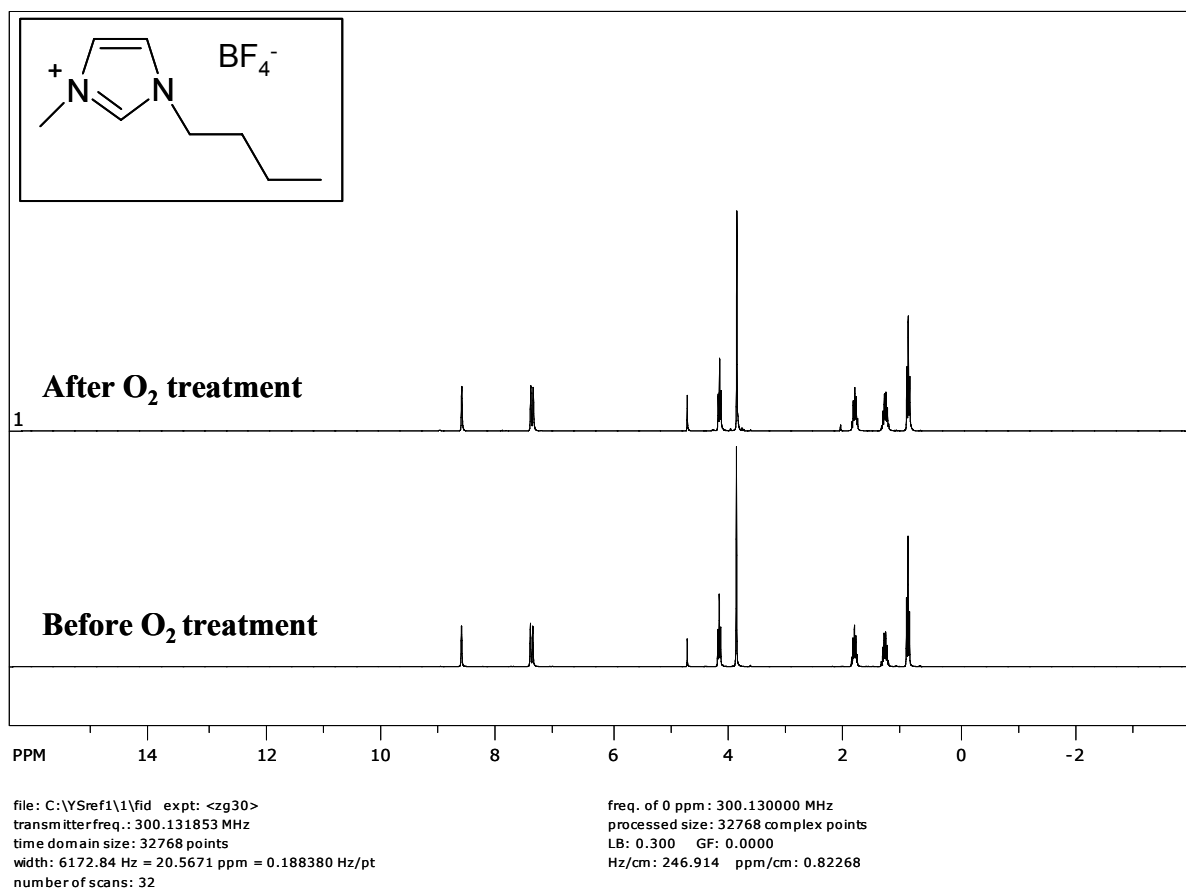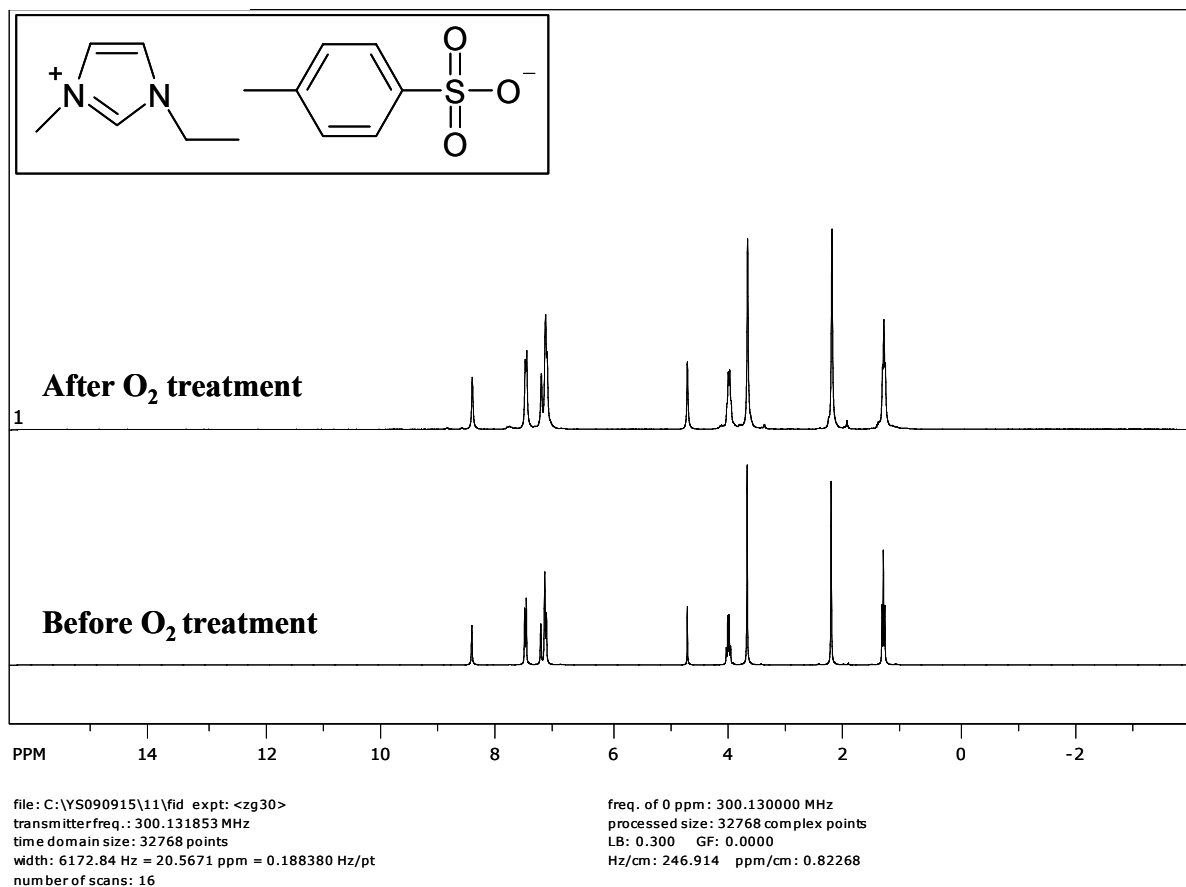

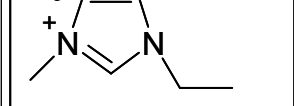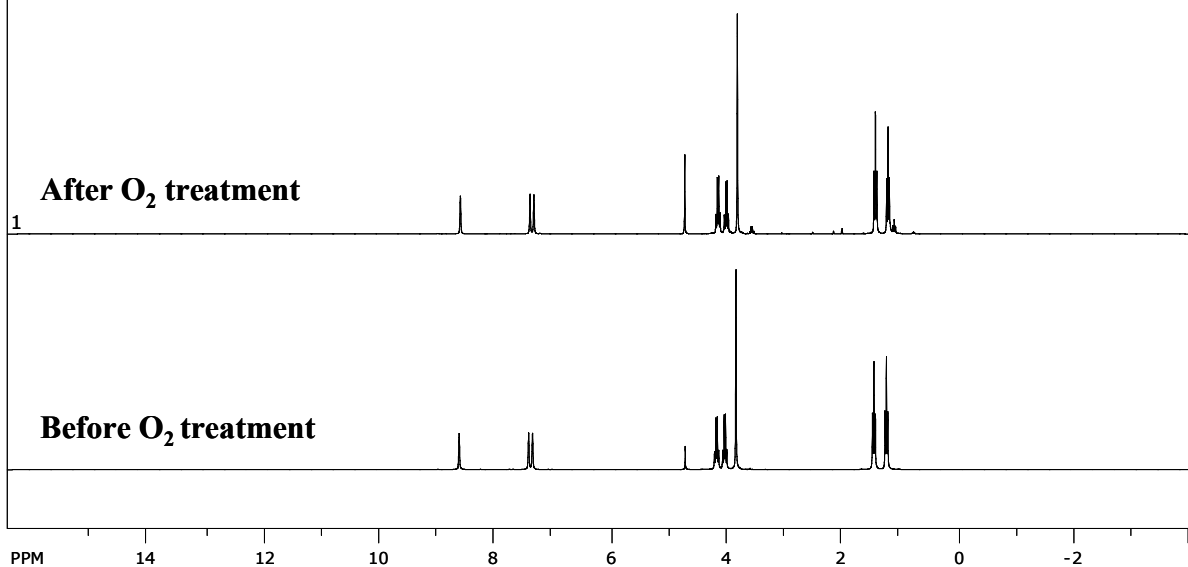

file: C:\YSref2\1\fid\_expt: <zg30>  
transmitterfreq.: 300.131853 MHz  
time domain size: 32768 points  
width: 6172.84 Hz = 20.5671 ppm = 0.188380 Hz/pt  
number of scans: 32

freq. of 0 ppm: 300.130000 MHz  
processed size: 32768 complex points  
LB: 0.300 GF: 0.0000  
Hz/cm: 246.914 ppm/cm: 0.82268

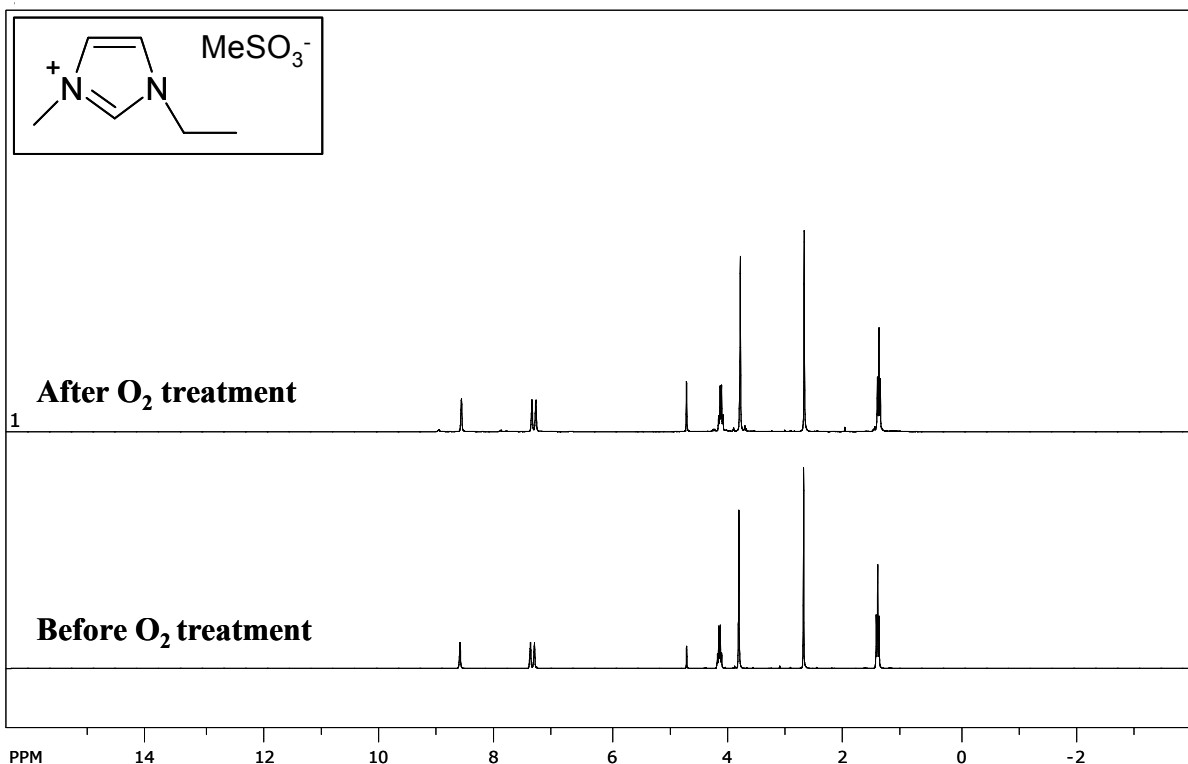

file: C:\YS090915\10\fid\_expt: <zg30>  
transmitterfreq.: 300.131853 MHz  
time domain size: 32768 points  
width: 6172.84 Hz = 20.5671 ppm = 0.188380 Hz/pt  
number of scans: 16

freq. of 0 ppm: 300.130000 MHz  
processed size: 32768 complex points  
LB: 0.300 GF: 0.0000  
Hz/cm: 246.914 ppm/cm: 0.82268
